# Supplementary material for: Effects of Kinesio Tape on Delayed Onset Muscle Soreness: A Systematic Review and Meta-analysis
Source: PubMed Central journal article supplement (PMC8188598; doi:10.1155/2021/6692828), 2021-05-31
Supplement: 6692828.f1.pdf [file 6692828.f1.pdf]

| Database                      | Search Strategy                                                                                                                                                                                                                                                                                                                                                                                                                                                                                                                                                                                                                                                                                                                                                                                                                                                       | Result                                                                                                                                                                                                                                                                                                                                                                                                                                                                                                                                                                                                                                                                                                                                  |
|-------------------------------|-----------------------------------------------------------------------------------------------------------------------------------------------------------------------------------------------------------------------------------------------------------------------------------------------------------------------------------------------------------------------------------------------------------------------------------------------------------------------------------------------------------------------------------------------------------------------------------------------------------------------------------------------------------------------------------------------------------------------------------------------------------------------------------------------------------------------------------------------------------------------|-----------------------------------------------------------------------------------------------------------------------------------------------------------------------------------------------------------------------------------------------------------------------------------------------------------------------------------------------------------------------------------------------------------------------------------------------------------------------------------------------------------------------------------------------------------------------------------------------------------------------------------------------------------------------------------------------------------------------------------------|
| <b>Pubmed,</b><br><b>N=92</b> | (((("athletic tape"[MeSH Terms] OR ("athletic"[All Fields] AND "tape"[All Fields]) OR "athletic tape"[All Fields] OR ("tape"[All Fields] AND "athletic"[All Fields])) OR ("athletic tape"[MeSH Terms] OR ("athletic"[All Fields] AND "tape"[All Fields]) OR "athletic tape"[All Fields] OR ("orthotic"[All Fields] AND "tape"[All Fields]) OR "orthotic tape"[All Fields])) OR ("athletic tape"[MeSH Terms] OR ("athletic"[All Fields] AND "tape"[All Fields]) OR "athletic tape"[All Fields] OR ("kinesio"[All Fields] AND "tape"[All Fields]) OR "kinesio tape"[All Fields])) OR ("athletic tape"[MeSH Terms] OR ("athletic"[All Fields] AND "tape"[All Fields]) OR "athletic tape"[All Fields] OR "kinesiotape"[All Fields])) AND ("muscles"[MeSH Terms] OR "muscles"[All Fields] OR "muscle"[All Fields])) AND ("exercise"[MeSH Terms] OR "exercise"[All Fields]) |  <p>NCBI Resources How To Sign in to NCBI</p> <p>PubMed Search</p> <p>US National Library of Medicine National Institutes of Health</p> <p>Format: Summary Sort by: Most Recent Per page: 20 Filters: Manage Filters</p> <p>Send to Sort by:</p> <p>Best match</p> <p>Most recent</p> <p>Search results</p> <p>Items: 1 to 20 of 92</p> <p>&lt;&lt; First &lt; Prev Page 1 of 5 Next &gt; Last &gt;&gt;</p> <p>Article types</p> <ul style="list-style-type: none"> <li>Clinical Trial</li> <li>Review</li> <li>Customize ...</li> </ul> <p>Text availability</p> <ul style="list-style-type: none"> <li>Abstract</li> <li>Free full text</li> </ul> |

Cochrane library,  
N=83

Kinesio tape and muscle

The screenshot shows the Cochrane Library search results page. The search query is "Kinesio Tape and muscle and exercise in Title Abstract Keyword". The results show 83 trials matching the search. The first result is "Effects of kinesio taping on anaerobic power and capacity results" from the Journal of Sports Medicine and Physical Fitness, 2016, 56(6), 709-713. The page includes filters for year, year first published, and order by relevance. There are also options to select all results and export selected citations.

PEDro,  
N=50

Kinesio tape and muscle

The screenshot shows the PEDro search results page for the search keyword "kinesio tape and muscle". The results are listed under "Results 1 - 50". The first result is "Therapeutic Taping" from Physical Therapy Products, Apr 2009, Vol. 20 Issue 3, p20. The second result is "Kinesio Taping Method Offers MTs an Economical Alternative" from Massage Magazine, May 2009, Issue 156, p57. The page also includes a section for "Citations that match the search keyword phrase: kinesio tape and muscle".

Embase.  
N=107

(kinesio AND tape OR (tape, AND athletic) OR (tape, AND orthotic)) AND muscle AND ('exercise'/exp OR exercise)

The screenshot shows the Embase search results page for the query "(kinesio AND tape OR (tape, AND athletic) OR (tape, AND orthotic)) AND muscle AND ('exercise'/exp OR exercise)". The results show 107 results for search #1. The first result is "The effect of deloading tape on medial gastrocnemius muscle fascicle behaviour during dynamic exercise" from the Journal of Sports Sciences, 2019, 37:16 (1874-1883). The page includes filters for sources, drugs, diseases, devices, and floating subheadings. There are also options to expand, collapse, and search for similar records.

CNKI,  
N=208

Kinesio tape and muscle and exercise

The image shows two screenshots from the CNKI (China National Knowledge Infrastructure) database. The top screenshot displays search results for the query '肌内贴肌内运动'. It includes a list of articles with columns for title, author, journal, and publication date. The bottom screenshot shows a search for '肌内贴肌内' with a line graph illustrating the trend of publications from 1989 to 2019. The graph shows a significant increase in the number of articles starting around 2010, peaking in 2017, and then declining.

| 标题                              | 作者                      | 来源     | 发表时间             | 期刊 | 下载 |
|---------------------------------|-------------------------|--------|------------------|----|----|
| 透刺针法联合肌内贴治疗卒中后肩手综合征I期的疗效观察      | 陈武霞, 孙莹, 赵鹏飞, 罗宇        | 河北中医   | 2019-12-06 11:19 | 期刊 | 5  |
| 肌内贴预防脑卒中后肩关节半脱位的临床研究            | 蔡秀梅, 冯林, 曾武, 冯静, 陈永, 李洪 | 世界中医药学 | 2019-12-01       | 期刊 | 6  |
| 肌内贴扎技术结合常规康复治疗对痉挛型脑瘫儿童下肢运动功能的影响 | 张瑞娟, 王雅楠, 潘晶            | 世界中医药学 | 2019-11-19       | 期刊 | 5  |
| 肌内贴扎技术对早期脑卒中后肩痛疼痛的疗效研究          | 刘颖                      | 世界中医药学 | 2019-11-01       | 期刊 | 12 |

  

| 年份   | 数量 |
|------|----|
| 1989 | 0  |
| 1991 | 0  |
| 1993 | 0  |
| 1995 | 0  |
| 1997 | 0  |
| 1999 | 0  |
| 2001 | 0  |
| 2003 | 0  |
| 2005 | 0  |
| 2007 | 0  |
| 2009 | 0  |
| 2011 | 15 |
| 2013 | 25 |
| 2015 | 35 |
| 2017 | 40 |
| 2019 | 30 |

VIP, N=73

Kinesio tape and muscle

WangFang, Kinesio tape and muscle and exercise  
N=450

The screenshot displays the Wanfang Data (万方数据) website interface. At the top, there is a navigation bar with the logo and the text '万方数据 知识服务平台'. Below this is a search bar containing the text '肌肉贴 肌肉运动'. The main content area shows a list of search results. The first result is titled '1. 振动刺激增加肌肉效能治疗运动性膝关节疼痛的镇痛作用'. The second result is titled '2. 肌肉效能对运动性膝关节疼痛的镇痛作用'. The interface includes various filters and options for viewing and downloading the results.

S1. Details of search strategies (Electronic search strategy and result for seven database.)
